# Supplementary material
Source: publisher site journal article supplement (https://www.kjim.org/upload/media/kjim-2024-384-Supplementary-Table-2.pdf)
Supplement: Supplementary file 1 [file kjim-2024-384-Supplementary-Table-2.pdf]

**Supplementary Table 2. Uni- and multivariate analyses of risk factors associated with indeterminate or positive deep resection margins in rectal neuroendocrine tumors**

| Factor                          | Univariate analysis |                | Multivariate analysis |                |
|---------------------------------|---------------------|----------------|-----------------------|----------------|
|                                 | OR (95% CI)         | <i>p</i> value | OR (95% CI)           | <i>p</i> value |
| Sex, male vs. female            | 0.73 (0.24–2.08)    | 0.551          | -                     | -              |
| Age, ≤ median vs. > median      | 1.01 (0.97–1.06)    | 0.557          | -                     | -              |
| EUS evaluation before resection |                     |                |                       |                |
| SSI-mEUS vs. no EUS/mEUS-only   | 6.58 (1.59–60.43)   | 0.007          | 6.64 (1.61–61.07)     | 0.006          |
| Procedural method               |                     |                |                       |                |
| ESD vs. modified EMR            | 1.04 (0.34–4.14)    | 0.947          | -                     | -              |
| Primary tumor size              |                     |                |                       |                |
| ≤ 5 mm vs. > 5 mm               | 0.49 (0.16–1.33)    | 0.163          | -                     | -              |
| Lifting                         |                     |                |                       |                |
| Non-lifting vs lifting          | 2.39 (0.76–6.71)    | 0.128          | 2.47 (0.77–7.09)      | 0.121          |

OR, odds ratio; CI, confidence interval; EUS, endoscopic ultrasound; SSI-mEUS, mini-probe EUS followed by submucosal saline injection; ESD, endoscopic submucosal dissection; EMR, endoscopic mucosal resection.
